# Supplementary material for: Computational anatomy and geometric shape analysis enables analysis of complex craniofacial phenotypes in zebrafish
Source: Oxford University Press journal article supplement (doi:10.1242/bio.058948), 2022-01-24
Supplement: bio058948supp.pdf [file bio058948supp.pdf]

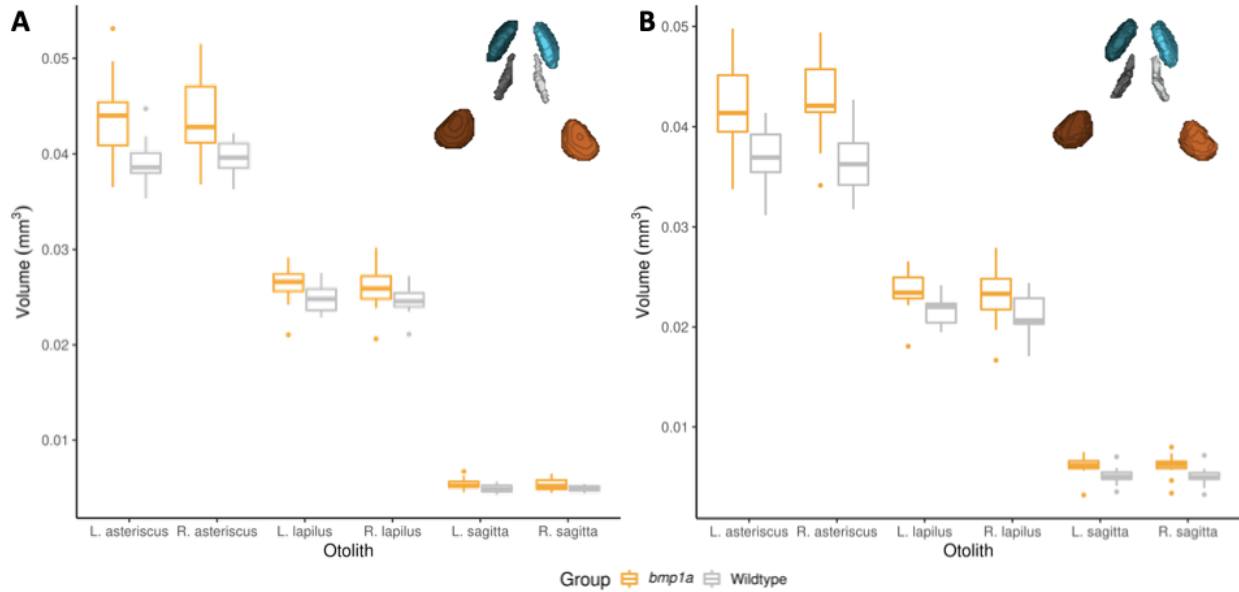

**Fig. S1.** Boxplots of segmented otolith volumes. Wildtype (grey) and *bmp1a* mutant (orange) boxplots are shown for each of the six otoliths for both the (A) manually segmented volumes and (B) atlas segmented volumes. For each otolith, mutants have larger median volumes than wildtype fish (Table 1). Insets show the dorsal view of otolith segments (asterisk in blue, lapilus in orange, and sagitta in grey) with lighter colors on the left side of the head, and darker colors on the right.

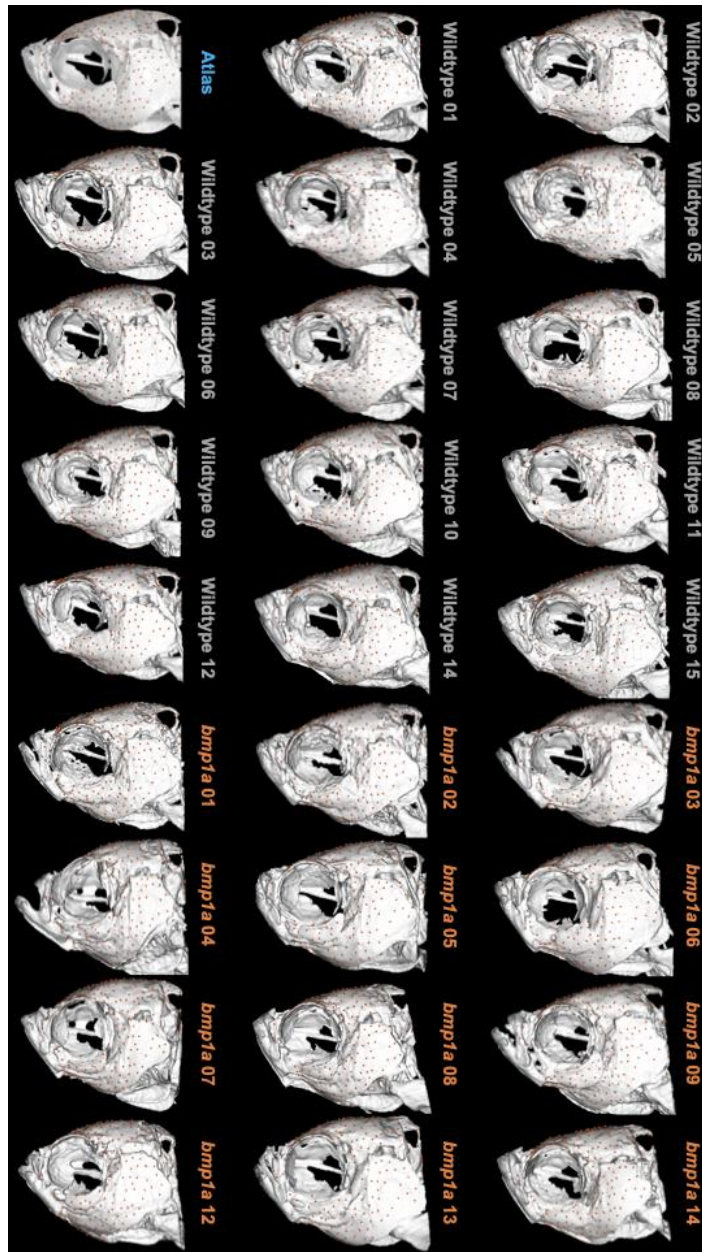

**Fig. S2.** Left lateral view of fish meshes with pseudo-landmarks generated from the PseudoLMGenerator and transverse using the ALPACA modules in SlicerMorph. Name color represents groupings, the atlas is in blue, wildtype fish are in grey and *bmp1a* fish are in orange.

**Table S1.** Welch two sample t-test for difference between manual and atlas-segmented otolith volumes for *bmp1a* and wildtype fish. We provide the mean volumes(x) for each method, degrees of freedom (df), test statistic (t), p value (p), and confidence interval (UCL-LCL).

| Otolith          | group        | x atlas (mm <sup>3</sup> ) | x manual (mm <sup>3</sup> ) | df     | t      | p      | UCL      | LCL     |
|------------------|--------------|----------------------------|-----------------------------|--------|--------|--------|----------|---------|
| Left asteriscus  | <i>bmp1a</i> | 0.042                      | 0.044                       | 21.971 | -0.902 | 0.377  | -0.006   | 0.044   |
| Left asteriscus  | wildtype     | 0.037                      | 0.039                       | 25.117 | -1.998 | 0.057  | -3.995   | 6.056   |
| Right asteriscus | <i>bmp1a</i> | 0.043                      | 0.044                       | 21.997 | -0.618 | 0.543  | -0.005   | 0.003   |
| Right asteriscus | wildtype     | 0.037                      | 0.040                       | 20.891 | -2.744 | 0.012  | -0.005   | -0.0007 |
| Left lapilus     | <i>bmp1a</i> | 0.024                      | 0.026                       | 22.000 | -3.074 | 0.006  | -0.005   | -0.0009 |
| Left lapilus     | wildtype     | 0.022                      | 0.025                       | 25.581 | -5.438 | <0.001 | -0.004   | -0.002  |
| Right lapilus    | <i>bmp1a</i> | 0.023                      | 0.026                       | 20.94  | -2.490 | 0.021  | -0.005   | -0.0005 |
| Right lapilus    | wildtype     | 0.021                      | 0.025                       | 24.294 | -5.347 | <0.001 | -0.005   | -0.002  |
| Left sagitta     | <i>bmp1a</i> | 0.006                      | 0.005                       | 17.619 | 1.998  | 0.061  | -0.00004 | -0.002  |
| Left sagitta     | wildtype     | 0.005                      | 0.005                       | 19.564 | 0.799  | 0.434  | -0.0003  | 0.0007  |
| Right sagitta    | <i>bmp1a</i> | 0.006                      | 0.005                       | 16.603 | 1.934  | 0.070  | -0.0006  | 0.002   |
| Right sagitta    | wildtype     | 0.005                      | 0.005                       | 15.959 | 0.236  | 0.816  | -0.0005  | 0.0005  |

**Table S2.** Principle component (PC) scores for first 10 PCs of symmetric component of shape analysis.

|                             | PC1     | PC2     | PC3     | PC4     | PC5     | PC6     | PC7     | PC8     | PC9     | PC10    |
|-----------------------------|---------|---------|---------|---------|---------|---------|---------|---------|---------|---------|
| symm_sham_atlas             | -0.0045 | -0.0071 | -0.0076 | -0.0019 | 0.0071  | 0.0025  | 0.0029  | -0.0026 | -0.0052 | -0.0009 |
| msbl95ABsham15              | 0.0195  | -0.0157 | 0.0059  | -0.0056 | 0.0007  | -0.0080 | -0.0185 | -0.0061 | -0.0050 | 0.0024  |
| msbl95ABsham14              | -0.0326 | 0.0036  | 0.0023  | 0.0043  | 0.0063  | -0.0040 | -0.0015 | -0.0022 | 0.0091  | -0.0039 |
| msbl95ABsham12              | -0.0424 | 0.0012  | 0.0210  | 0.0118  | -0.0092 | 0.0058  | -0.0007 | -0.0028 | 0.0014  | -0.0011 |
| msbl95ABsham11              | -0.0202 | -0.0220 | -0.0059 | 0.0103  | -0.0073 | 0.0002  | 0.0013  | -0.0054 | -0.0084 | 0.0038  |
| msbl95ABsham10              | 0.0214  | -0.0182 | 0.0026  | -0.0023 | 0.0067  | 0.0072  | -0.0030 | 0.0052  | -0.0040 | -0.0028 |
| msbl95ABsham09              | 0.0316  | -0.0092 | 0.0030  | -0.0064 | 0.0001  | 0.0040  | 0.0039  | 0.0089  | 0.0026  | -0.0072 |
| msbl95ABsham08              | -0.0032 | -0.0131 | 0.0013  | -0.0078 | -0.0123 | 0.0008  | 0.0033  | -0.0034 | -0.0033 | -0.0038 |
| msbl95ABsham07              | -0.0006 | -0.0147 | -0.0180 | -0.0021 | 0.0062  | -0.0041 | -0.0055 | 0.0024  | 0.0102  | 0.0000  |
| msbl95ABsham06              | -0.0358 | -0.0054 | -0.0175 | 0.0041  | 0.0044  | 0.0038  | 0.0012  | 0.0036  | 0.0048  | 0.0011  |
| msbl95ABsham05              | -0.0354 | 0.0110  | 0.0002  | -0.0092 | -0.0015 | 0.0100  | -0.0071 | 0.0002  | -0.0044 | -0.0095 |
| msbl95ABsham04              | -0.0390 | 0.0025  | -0.0056 | 0.0004  | -0.0020 | -0.0073 | 0.0047  | 0.0025  | -0.0047 | 0.0042  |
| msbl95ABsham03              | 0.0036  | 0.0029  | -0.0089 | -0.0222 | 0.0019  | 0.0024  | 0.0031  | 0.0022  | -0.0083 | 0.0069  |
| msbl95ABsham02              | 0.0101  | -0.0146 | 0.0059  | -0.0007 | 0.0086  | -0.0070 | 0.0028  | 0.0005  | 0.0028  | -0.0043 |
| msbl95ABsham01              | -0.0055 | -0.0039 | 0.0039  | -0.0039 | -0.0143 | -0.0037 | 0.0017  | -0.0059 | 0.0022  | -0.0010 |
| msbl_95AB_bmp1a_crispant_14 | 0.0145  | -0.0023 | 0.0312  | 0.0153  | 0.0128  | 0.0001  | 0.0070  | 0.0037  | -0.0057 | 0.0013  |
| msbl_95AB_bmp1a_crispant_13 | 0.0221  | 0.0113  | -0.0032 | -0.0025 | -0.0030 | 0.0054  | -0.0009 | -0.0075 | 0.0022  | -0.0093 |
| msbl_95AB_bmp1a_crispant_12 | 0.0149  | 0.0048  | -0.0126 | 0.0067  | -0.0053 | 0.0253  | 0.0016  | 0.0048  | 0.0013  | 0.0056  |
| msbl_95AB_bmp1a_crispant_09 | 0.0043  | 0.0178  | -0.0079 | -0.0102 | -0.0017 | -0.0154 | 0.0081  | 0.0065  | -0.0055 | -0.0064 |
| msbl_95AB_bmp1a_crispant_08 | -0.0028 | 0.0064  | -0.0014 | 0.0140  | -0.0136 | -0.0106 | 0.0037  | 0.0074  | 0.0022  | 0.0026  |
| msbl_95AB_bmp1a_crispant_07 | 0.0118  | 0.0189  | -0.0022 | 0.0147  | 0.0108  | 0.0045  | 0.0054  | -0.0095 | -0.0012 | -0.0015 |
| msbl_95AB_bmp1a_crispant_06 | 0.0178  | -0.0209 | -0.0036 | 0.0099  | -0.0003 | -0.0034 | 0.0036  | -0.0001 | 0.0059  | 0.0024  |
| msbl_95AB_bmp1a_crispant_05 | -0.0034 | 0.0112  | 0.0164  | -0.0070 | 0.0023  | 0.0017  | -0.0078 | 0.0067  | 0.0015  | 0.0056  |
| msbl_95AB_bmp1a_crispant_04 | 0.0505  | 0.0205  | -0.0161 | 0.0203  | -0.0040 | -0.0064 | -0.0077 | -0.0018 | -0.0037 | 0.0010  |
| msbl_95AB_bmp1a_crispant_03 | 0.0265  | 0.0063  | 0.0088  | -0.0212 | -0.0012 | 0.0005  | 0.0102  | -0.0104 | 0.0079  | 0.0076  |
| msbl_95AB_bmp1a_crispant_02 | 0.0083  | 0.0148  | 0.0129  | -0.0054 | -0.0086 | -0.0006 | -0.0083 | 0.0056  | 0.0051  | 0.0028  |
| msbl_95AB_bmp1a_crispant_01 | -0.0317 | 0.0142  | -0.0048 | -0.0034 | 0.0166  | -0.0039 | -0.0037 | -0.0026 | 0.0000  | 0.0042  |

**Table S3.** Principle component (PC) scores for first 10 PCs of asymmetric component of shape analysis.

|                             | PC1     | PC2     | PC3     | PC4     | PC5     | PC6     | PC7     | PC8     | PC9     | PC10    |
|-----------------------------|---------|---------|---------|---------|---------|---------|---------|---------|---------|---------|
| symm_sham_atlas             | -0.0045 | -0.0071 | -0.0076 | -0.0019 | 0.0071  | 0.0025  | 0.0029  | -0.0026 | -0.0052 | -0.0009 |
| msbl95ABsham15              | 0.0195  | -0.0157 | 0.0059  | -0.0056 | 0.0007  | -0.0080 | -0.0185 | -0.0061 | -0.0050 | 0.0024  |
| msbl95ABsham14              | -0.0326 | 0.0036  | 0.0023  | 0.0043  | 0.0063  | -0.0040 | -0.0015 | -0.0022 | 0.0091  | -0.0039 |
| msbl95ABsham12              | -0.0424 | 0.0012  | 0.0210  | 0.0118  | -0.0092 | 0.0058  | -0.0007 | -0.0028 | 0.0014  | -0.0011 |
| msbl95ABsham11              | -0.0202 | -0.0220 | -0.0059 | 0.0103  | -0.0073 | 0.0002  | 0.0013  | -0.0054 | -0.0084 | 0.0038  |
| msbl95ABsham10              | 0.0214  | -0.0182 | 0.0026  | -0.0023 | 0.0067  | 0.0072  | -0.0030 | 0.0052  | -0.0040 | -0.0028 |
| msbl95ABsham09              | 0.0316  | -0.0092 | 0.0030  | -0.0064 | 0.0001  | 0.0040  | 0.0039  | 0.0089  | 0.0026  | -0.0072 |
| msbl95ABsham08              | -0.0032 | -0.0131 | 0.0013  | -0.0078 | -0.0123 | 0.0008  | 0.0033  | -0.0034 | -0.0033 | -0.0038 |
| msbl95ABsham07              | -0.0006 | -0.0147 | -0.0180 | -0.0021 | 0.0062  | -0.0041 | -0.0055 | 0.0024  | 0.0102  | 0.0000  |
| msbl95ABsham06              | -0.0358 | -0.0054 | -0.0175 | 0.0041  | 0.0044  | 0.0038  | 0.0012  | 0.0036  | 0.0048  | 0.0011  |
| msbl95ABsham05              | -0.0354 | 0.0110  | 0.0002  | -0.0092 | -0.0015 | 0.0100  | -0.0071 | 0.0002  | -0.0044 | -0.0095 |
| msbl95ABsham04              | -0.0390 | 0.0025  | -0.0056 | 0.0004  | -0.0020 | -0.0073 | 0.0047  | 0.0025  | -0.0047 | 0.0042  |
| msbl95ABsham03              | 0.0036  | 0.0029  | -0.0089 | -0.0222 | 0.0019  | 0.0024  | 0.0031  | 0.0022  | -0.0083 | 0.0069  |
| msbl95ABsham02              | 0.0101  | -0.0146 | 0.0059  | -0.0007 | 0.0086  | -0.0070 | 0.0028  | 0.0005  | 0.0028  | -0.0043 |
| msbl95ABsham01              | -0.0055 | -0.0039 | 0.0039  | -0.0039 | -0.0143 | -0.0037 | 0.0017  | -0.0059 | 0.0022  | -0.0010 |
| msbl_95AB_bmp1a_crispant_14 | 0.0145  | -0.0023 | 0.0312  | 0.0153  | 0.0128  | 0.0001  | 0.0070  | 0.0037  | -0.0057 | 0.0013  |
| msbl_95AB_bmp1a_crispant_13 | 0.0221  | 0.0113  | -0.0032 | -0.0025 | -0.0030 | 0.0054  | -0.0009 | -0.0075 | 0.0022  | -0.0093 |
| msbl_95AB_bmp1a_crispant_12 | 0.0149  | 0.0048  | -0.0126 | 0.0067  | -0.0053 | 0.0253  | 0.0016  | 0.0048  | 0.0013  | 0.0056  |
| msbl_95AB_bmp1a_crispant_09 | 0.0043  | 0.0178  | -0.0079 | -0.0102 | -0.0017 | -0.0154 | 0.0081  | 0.0065  | -0.0055 | -0.0064 |
| msbl_95AB_bmp1a_crispant_08 | -0.0028 | 0.0064  | -0.0014 | 0.0140  | -0.0136 | -0.0106 | 0.0037  | 0.0074  | 0.0022  | 0.0026  |
| msbl_95AB_bmp1a_crispant_07 | 0.0118  | 0.0189  | -0.0022 | 0.0147  | 0.0108  | 0.0045  | 0.0054  | -0.0095 | -0.0012 | -0.0015 |
| msbl_95AB_bmp1a_crispant_06 | 0.0178  | -0.0209 | -0.0036 | 0.0099  | -0.0003 | -0.0034 | 0.0036  | -0.0001 | 0.0059  | 0.0024  |
| msbl_95AB_bmp1a_crispant_05 | -0.0034 | 0.0112  | 0.0164  | -0.0070 | 0.0023  | 0.0017  | -0.0078 | 0.0067  | 0.0015  | 0.0056  |
| msbl_95AB_bmp1a_crispant_04 | 0.0505  | 0.0205  | -0.0161 | 0.0203  | -0.0040 | -0.0064 | -0.0077 | -0.0018 | -0.0037 | 0.0010  |
| msbl_95AB_bmp1a_crispant_03 | 0.0265  | 0.0063  | 0.0088  | -0.0212 | -0.0012 | 0.0005  | 0.0102  | -0.0104 | 0.0079  | 0.0076  |
| msbl_95AB_bmp1a_crispant_02 | 0.0083  | 0.0148  | 0.0129  | -0.0054 | -0.0086 | -0.0006 | -0.0083 | 0.0056  | 0.0051  | 0.0028  |
| msbl_95AB_bmp1a_crispant_01 | -0.0317 | 0.0142  | -0.0048 | -0.0034 | 0.0166  | -0.0039 | -0.0037 | -0.0026 | 0.0000  | 0.0042  |
